# Supplementary material for: LandInG 1.0: a toolbox to derive input datasets for terrestrial ecosystem modelling at variable resolutions from heterogeneous sources
Source: Copernicus journal article supplement (doi:10.5194/gmd-16-3375-2023), 2023-06-15
Supplement: Supplementary file 1 [file gmd-16-3375-2023-supplement.pdf]

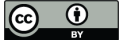

*Supplement of*

## **LandInG 1.0: a toolbox to derive input datasets for terrestrial ecosystem modelling at variable resolutions from heterogeneous sources**

**Sebastian Ostberg et al.**

*Correspondence to:* Sebastian Ostberg (ostberg@pik-potsdam.de)

The copyright of individual parts of the supplement might differ from the article licence.

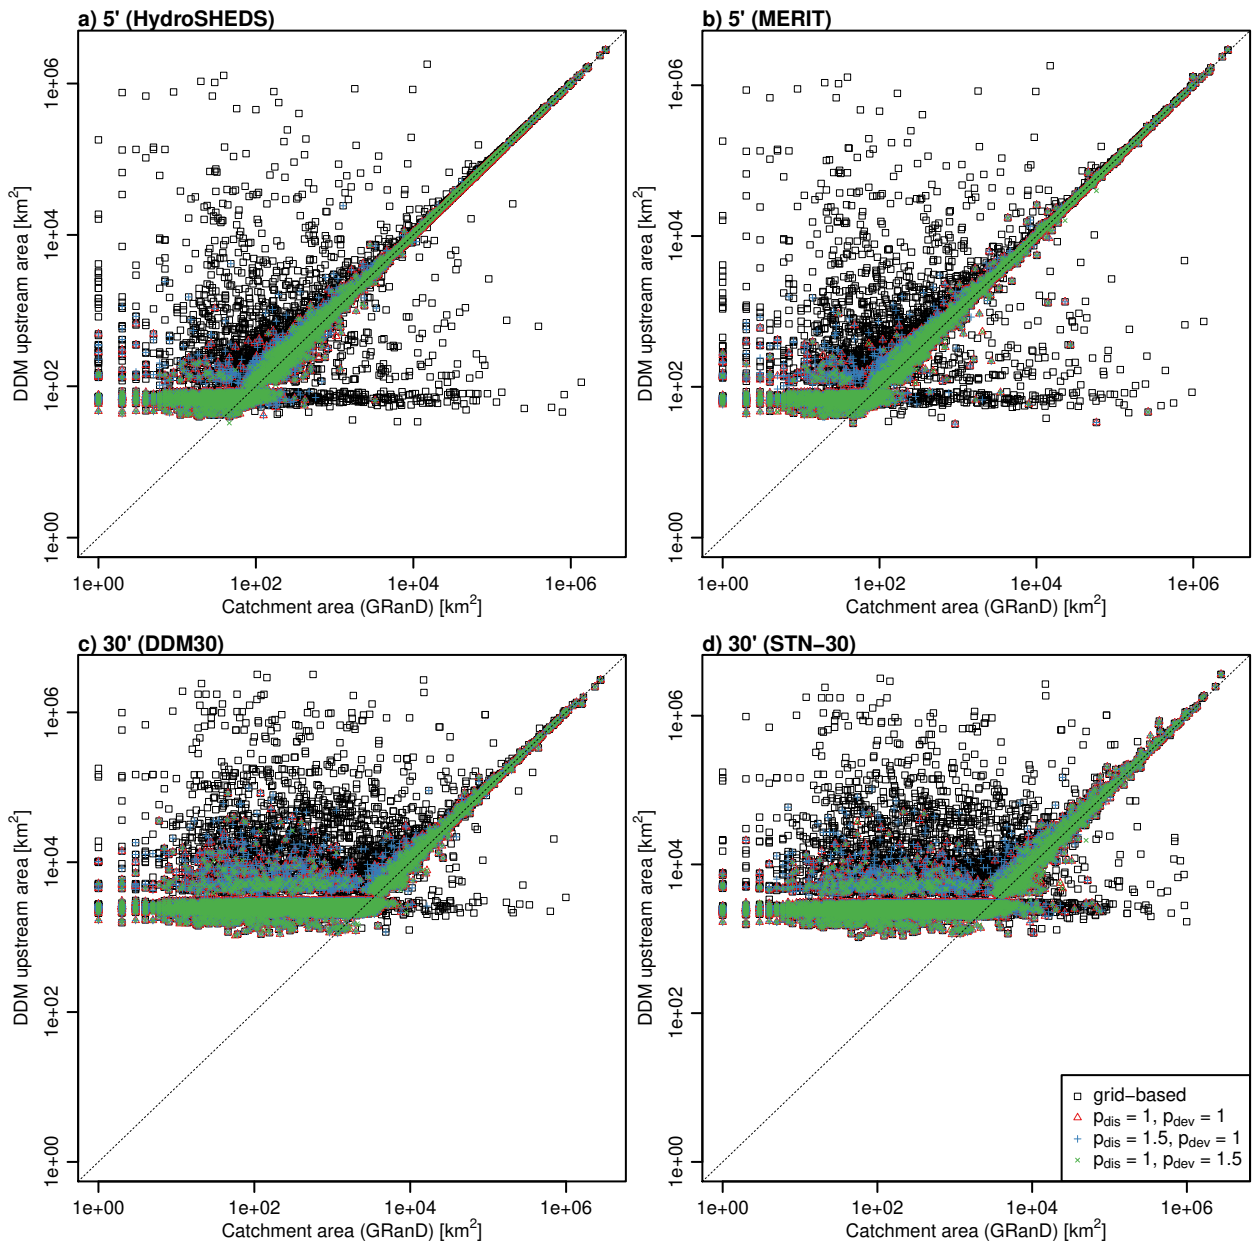

**Figure S1.** Comparison between reported catchment area and upstream area of assigned grid cell using 4 different drainage direction maps (DDMs) and 4 assignment strategies. DDMs at 5' spatial resolution by Lehner et al. (2008) (HydroSHEDS) and Eilander et al. (2020, 2021) (MERIT), DDMs at 30' spatial resolution by Döll and Lehner (2002) (DDM30) and Vörösmarty et al. (2000) (STN-30). Weighting-based assignment strategies (red, blue, and green symbols) significantly improve match between reported catchment area reported and DDM-derived upstream areas compared to grid-based assignment (black squares).

**Table S1.** Example diagnostics of spatial redistribution algorithm for Burkina Faso in 2015. total = total harvested area of crop in Burkina Faso, redist. = harvested area relocated by redistribution algorithm, additive = harvested area relocated by additive approach, OOP = harvested area located out of pattern, # iter. = number of iterations of redistribution algorithm, pattern: MON dataset has pattern for this crop in this country

| Crop                                         | Rainfed harvested area [ha] |                |                 |            |                | Irrigated harvested area [ha] |                |                 |            |                | Pattern |
|----------------------------------------------|-----------------------------|----------------|-----------------|------------|----------------|-------------------------------|----------------|-----------------|------------|----------------|---------|
|                                              | <i>total</i>                | <i>redist.</i> | <i>additive</i> | <i>OOP</i> | <i># iter.</i> | <i>total</i>                  | <i>redist.</i> | <i>additive</i> | <i>OOP</i> | <i># iter.</i> |         |
| Almonds, with shell                          | 2510                        | 159            | 0               | 0          | 1000           | 195                           | 6              | 2               | 0          | 17             | TRUE    |
| Fruit, fresh nes                             | 12367                       | 887            | 47              | 19         | 1000           | 963                           | 36             | 11              | 1          | 20             | TRUE    |
| Maize                                        | 782289                      | 134255         | 84              | 6175       | 1000           | 37828                         | 2019           | 603             | 32         | 43             | TRUE    |
| Millet                                       | 1160718                     | 65934          | 2779            | 4372       | 1000           | –                             | –              | –               | –          | –              | TRUE    |
| Oranges                                      | 129                         | 10             | 0               | 0          | 1000           | –                             | –              | –               | –          | –              | TRUE    |
| Potatoes                                     | 558                         | 35             | 0               | 0          | 1000           | 167                           | 5              | 1               | 0          | 17             | TRUE    |
| Pulses nes                                   | 18766                       | 1438           | 114             | 5          | 1000           | –                             | –              | –               | –          | –              | TRUE    |
| Rice, paddy                                  | 119394                      | 20096          | 2               | 1110       | 1000           | 23321                         | 1394           | 355             | 19         | 36             | TRUE    |
| Seed cotton                                  | 557840                      | 57020          | 0               | 16480      | 940            | –                             | –              | –               | –          | –              | TRUE    |
| Sesame seed                                  | 374391                      | 95161          | 0               | 6575       | 994            | 25864                         | 1789           | 462             | 50         | 47             | TRUE    |
| Spices nes                                   | 3078                        | 195            | 0               | 0          | 1000           | 213                           | 6              | 2               | 0          | 17             | TRUE    |
| Sugar cane                                   | 102                         | 28             | 0               | 1          | 1000           | 4697                          | 284            | 83              | 35         | 30             | TRUE    |
| Vegetables, fresh nes                        | 21382                       | 1369           | 0               | 0          | 1000           | 1477                          | 43             | 13              | 0          | 17             | TRUE    |
| Beans, green                                 | 677                         | 43             | 0               | 0          | 1000           | 47                            | 1              | 0               | 0          | 16             | TRUE    |
| Chillies and peppers, green                  | 1587                        | 101            | 0               | 0          | 1000           | 110                           | 3              | 1               | 0          | 17             | TRUE    |
| Lemons and limes                             | 43                          | 3              | 0               | 0          | 1000           | –                             | –              | –               | –          | –              | TRUE    |
| Okra                                         | 2611                        | 166            | 0               | 0          | 1000           | 180                           | 5              | 2               | 0          | 18             | TRUE    |
| Onions, shallots, green                      | 1033                        | 66             | 0               | 0          | 1000           | 71                            | 2              | 1               | 0          | 17             | TRUE    |
| Sorghum                                      | 1444937                     | 88151          | 673             | 7810       | 1000           | –                             | –              | –               | –          | –              | TRUE    |
| Soybeans                                     | 18046                       | 1147           | 0               | 2          | 1000           | –                             | –              | –               | –          | –              | TRUE    |
| Tangerines, mandarins, clementines, satsumas | 40                          | 3              | 0               | 0          | 1000           | –                             | –              | –               | –          | –              | TRUE    |
| Tobacco, unmanufactured                      | 905                         | 28             | 0               | 18         | 994            | 63                            | 2              | 0               | 63         | 16             | TRUE    |
| Tomatoes                                     | 1147                        | 77             | 0               | 0          | 1000           | 79                            | 2              | 1               | 0          | 17             | TRUE    |
| Fruit, tropical fresh nes                    | 1676                        | 120            | 2               | 5          | 1000           | 131                           | 5              | 1               | 0          | 19             | TRUE    |
| Grapefruit (inc. pomelos)                    | 17                          | 1              | 0               | 0          | 1000           | –                             | –              | –               | –          | –              | TRUE    |
| Groundnuts, with shell                       | 432665                      | 44429          | 890             | 2380       | 1000           | –                             | –              | –               | –          | –              | TRUE    |
| Cassava                                      | 3520                        | 456            | 0               | 0          | 1000           | –                             | –              | –               | –          | –              | TRUE    |
| Yams                                         | 7304                        | 1277           | 0               | 131        | 941            | 505                           | 34             | 9               | 4          | 31             | TRUE    |
| Cashew nuts, with shell                      | 107092                      | 7065           | 0               | 0          | 1000           | 8339                          | 245            | 74              | 0          | 19             | TRUE    |
| Sweet potatoes                               | 5869                        | 837            | 27              | 10         | 1000           | 405                           | 12             | 7               | 3          | 18             | TRUE    |
| Mangoes, mangosteens, guavas                 | 1430                        | 103            | 2               | 4          | 1000           | 111                           | 4              | 1               | 0          | 19             | TRUE    |
| Cow peas, dry                                | 1185125                     | 75983          | 0               | 11         | 1000           | –                             | –              | –               | –          | –              | TRUE    |
| Fonio                                        | 14726                       | 2908           | 29              | 12         | 1000           | 1017                          | 38             | 17              | 6          | 21             | TRUE    |
| Karite nuts (sheanuts)                       | 30764                       | 1964           | 0               | 0          | 1000           | 2396                          | 70             | 21              | 0          | 18             | TRUE    |
| Bambara beans                                | 42025                       | 5196           | 13              | 236        | 1000           | –                             | –              | –               | –          | –              | TRUE    |

## References

- Döll, P. and Lehner, B.: Validation of a new global 30-min drainage direction map, *Journal of Hydrology*, 258, 214–231, [https://doi.org/10.1016/S0022-1694\(01\)00565-0](https://doi.org/10.1016/S0022-1694(01)00565-0), data available at <https://www.uni-frankfurt.de/45218101/DDM30>, accessed 2021-10-20, 2002.
- 5 Eilander, D., Winsemius, H. C., Van Verseveld, W., Yamazaki, D., Weerts, A., and Ward, P. J.: MERIT Hydro IHU, <https://doi.org/10.5281/zenodo.5166932>, accessed 2022-01-21, 2020.
- Eilander, D., van Verseveld, W., Yamazaki, D., Weerts, A., Winsemius, H. C., and Ward, P. J.: A hydrography upscaling method for scale-invariant parametrization of distributed hydrological models, *Hydrology and Earth System Sciences*, 25, 5287–5313, <https://doi.org/10.5194/hess-25-5287-2021>, 2021.
- 10 Lehner, B., Verdin, K., and Jarvis, A.: New Global Hydrography Derived From Spaceborne Elevation Data, *Eos, Transactions American Geophysical Union*, 89, 93–94, <https://doi.org/10.1029/2008EO100001>, data available at <https://www.hydrosheds.org>, accessed 2022-05-18, 2008.
- Vörösmarty, C. J., Fekete, B. M., Meybeck, M., and Lammers, R. B.: Global system of rivers: Its role in organizing continental land mass and defining land-to-ocean linkages, *Global Biogeochem. Cycles*, 14, 599–621, <https://doi.org/10.1029/1999GB900092>, data available at <https://wsag.unh.edu/Stn-30/stn-30.html>, accessed 2021-10-20, 2000.
- 15
